# Supplementary material for: Low Childhood Nature Exposure is Associated with Worse Mental Health in Adulthood
Source: PubMed Central journal article supplement (PMC6572245; doi:10.3390/ijerph16101809), 2019-05-22
Supplement: ijerph-16-01809-s001.pdf [file ijerph-16-01809-s001.pdf]

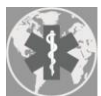

Supplementary Material

## Low Childhood Nature Exposure is Associated with Worse Mental Health in Adulthood

Myriam Preuß, Mark Nieuwenhuijsen, Sandra Marquez, Marta Cirach, Payam Dadvand, Margarita Triguero-Mas, Christopher Gidlow, Regina Grazuleviciene, Hanneke Kruijze and Wilma Zijlema

**Table S1.** Mixed effects regression of the potential mediators (perception of amount of NOE, use of NOE, satisfaction with NOE, importance of NOE, residential surrounding greenness in 300m) on mental health (0-100 scale; higher is better mental health). Pooled and city-specific analyses.

|                             |      | Crude model <sup>a</sup> | Adjusted model <sup>b</sup> |
|-----------------------------|------|--------------------------|-----------------------------|
|                             | n    | β-coefficient (95% CI)   | β-coefficient (95% CI)      |
| Perception of amount of NOE |      |                          |                             |
| Pooled                      | 3578 | 1.44 (0.31, 2.57)*       | 0.65 (-0.44, 1.75)          |
| Barcelona                   | 982  | 2.50 (0.29, 4.72)*       | 2.21 (0.13, 4.29)*          |
| Doetinchem                  | 848  | 1.54 (-0.31, 3.38)       | 0.89 (-0.90, 2.68)          |
| Kaunas                      | 892  | 2.56 (0.23, 4.88)*       | 1.69 (-0.57, 3.95)          |
| Stoke-on-Trent              | 856  | -0.32 (-2.50, 1.87)      | -1.61 (-3.79, 0.58)         |
| Use of NOE                  |      |                          |                             |
| Pooled                      | 3483 | 2.44 (1.38, 3.50)***     | 2.10 (1.07, 3.13)***        |
| Barcelona                   | 970  | 2.49 (0.46, 4.52)*       | 2.78 (0.83, 4.74)**         |
| Doetinchem                  | 840  | 3.06 (1.00, 5.11)**      | 2.17 (0.18, 4.15)*          |
| Kaunas                      | 817  | 0.91 (-1.41, 3.23)       | 1.16 (-1.14, 3.46)          |
| Stoke-on-Trent              | 856  | 3.96 (1.80, 6.12)***     | 2.58 (0.39, 4.77)*          |
| Satisfaction with NOE       |      |                          |                             |
| Pooled                      | 3574 | 2.87 (1.79, 3.94)***     | 2.12 (1.07, 3.17)***        |
| Barcelona                   | 977  | 4.89 (2.86, 6.91)***     | 4.38 (2.42, 6.34)***        |
| Doetinchem                  | 848  | 3.44 (1.44, 5.44)**      | 2.86 (0.93, 4.78)**         |
| Kaunas                      | 892  | 2.85 (0.58, 5.11)*       | 1.73 (-0.49, 3.95)          |
| Stoke-on-Trent              | 857  | 0.00 (-2.43, 2.44)       | -0.48 (-2.88, 1.92)         |
| Importance of NOE           |      |                          |                             |
| Pooled                      | 3578 | 2.18 (1.14, 3.21)***     | 2.17 (1.15, 3.19)***        |

|                                           |      |                      |                     |
|-------------------------------------------|------|----------------------|---------------------|
| Barcelona                                 | 981  | 2.69 (0.71, 4.66)**  | 2.61 (0.70, 4.52)** |
| Doetinchem                                | 847  | 0.05 (-1.89, 1.99)   | 0.59 (-1.30, 2.47)  |
| Kaunas                                    | 892  | 2.18 (-0.16, 4.52)   | 1.13 (-1.20, 3.48)  |
| Stoke-on-Trent                            | 858  | 3.97 (1.82, 6.12)*** | 3.73 (1.63, 5.84)** |
| Residential surrounding greenness in 300m |      |                      |                     |
| Pooled                                    | 3583 | 1.58 (0.12, 3.04)*   | 1.11 (-0.27, 2.49)  |
| Barcelona                                 | 983  | -0.25 (-3.21, 2.71)  | -1.35 (-3.96, 1.27) |
| Doetinchem                                | 848  | 0.55 (-1.35, 2.45)   | -0.20 (-2.03, 1.62) |
| Kaunas                                    | 892  | -0.90 (-3.15, 1.36)  | -0.48 (-2.71, 1.76) |
| Stoke-on-Trent                            | 860  | 1.73 (-0.96, 4.43)   | 0.85 (-1.73, 3.43)  |

\*  $p \leq 0.05$ ; \*\*  $p < 0.01$ ; \*\*\*  $p < 0.001$

<sup>a</sup> Unadjusted model with random intercepts

<sup>b</sup> Adjusted for age, gender, origin, education, perceived financial situation, SES of the neighborhood, household composition, smoking status

CI, confidence interval; n, number of participants; NOE, natural outdoor environments

**Table S2.** Mixed effects regression of the mediators (perception of amount of NOE, use of NOE, satisfaction with NOE, importance of NOE, residential surrounding greenness in 300m) on vitality (0-100 scale; higher is better vitality). Pooled and city-specific analyses.

|                             | n    | Crude model <sup>a</sup>      | Adjusted model <sup>b</sup>   |
|-----------------------------|------|-------------------------------|-------------------------------|
|                             |      | $\beta$ -coefficient (95% CI) | $\beta$ -coefficient (95% CI) |
| Perception of amount of NOE |      |                               |                               |
| Pooled                      | 3578 | 2.50 (1.21, 3.79)***          | 1.76 (0.49, 3.02)**           |
| Barcelona                   | 980  | 1.74 (-0.79, 4.26)            | 1.60 (-0.83, 4.02)            |
| Doetinchem                  | 850  | 2.57 (0.27, 4.88)*            | 2.11 (-0.13, 4.36)            |
| Kaunas                      | 892  | 2.30 (-0.03, 4.63)            | 1.57 (-0.69, 3.83)            |
| Stoke-on-Trent              | 856  | 2.67 (-0.04, 5.39)            | 1.70 (-0.99, 4.39)            |

## Use of NOE

|                |      |                      |                      |
|----------------|------|----------------------|----------------------|
| Pooled         | 3483 | 3.19 (1.96, 4.41)*** | 2.92 (1.73, 4.11)*** |
| Barcelona      | 968  | 2.46 (0.14, 4.79)*   | 2.73 (0.47, 4.99)*   |
| Doetinchem     | 842  | 5.45 (2.88, 8.02)*** | 4.21 (1.71, 6.71)**  |
| Kaunas         | 817  | 2.13 (-0.21, 4.46)   | 2.63 (0.33, 4.92)*   |
| Stoke-on-Trent | 856  | 5.28 (2.59, 7.97)*** | 4.02 (1.30, 6.73)**  |

## Satisfaction with NOE

|                |      |                      |                      |
|----------------|------|----------------------|----------------------|
| Pooled         | 3574 | 4.35 (3.12, 5.58)*** | 3.47 (2.26, 4.67)*** |
| Barcelona      | 975  | 4.82 (2.49, 7.14)*** | 4.26 (1.99, 6.53)*** |
| Doetinchem     | 850  | 2.06 (-0.46, 4.57)   | 1.35 (-1.09, 3.79)   |
| Kaunas         | 892  | 3.59 (1.33, 5.86)**  | 2.47 (0.25, 4.68)*   |
| Stoke-on-Trent | 857  | 1.47 (-1.57, 4.52)   | 1.52 (-1.44, 4.49)   |

## Importance of NOE

|                |      |                      |                      |
|----------------|------|----------------------|----------------------|
| Pooled         | 3578 | 2.53 (1.33, 3.72)*** | 2.74 (1.57, 3.92)*** |
| Barcelona      | 979  | 2.26 (0.01, 4.52)*   | 2.79 (0.59, 4.99)*   |
| Doetinchem     | 849  | 0.82 (-1.62, 3.26)   | 1.62 (-0.76, 3.99)   |
| Kaunas         | 892  | 0.89 (-1.46, 3.24)   | 0.01 (-2.33, 2.34)   |
| Stoke-on-Trent | 858  | 5.93 (3.24, 8.62)*** | 5.39 (2.78, 8.00)*** |

Residential surrounding  
greenness in 300m

|            |      |                     |                     |
|------------|------|---------------------|---------------------|
| Pooled     | 3583 | 0.92 (-0.74, 2.57)  | 0.50 (-1.08, 2.08)  |
| Barcelona  | 981  | 1.07 (-2.23, 4.37)  | -0.29 (-3.46, 2.88) |
| Doetinchem | 850  | 1.23 (-1.08, 3.55)  | 0.35 (-1.91, 2.61)  |
| Kaunas     | 892  | -0.26 (-2.54, 2.03) | 0.28 (-1.96, 2.52)  |

|                |     |                    |                    |
|----------------|-----|--------------------|--------------------|
| Stoke-on-Trent | 860 | 2.03 (-1.11, 5.18) | 1.10 (-1.84, 4.04) |
|----------------|-----|--------------------|--------------------|

\*  $p \leq 0.05$ ; \*\*  $p < 0.01$ ; \*\*\*  $p < 0.001$ <sup>a</sup> Unadjusted model with random intercepts<sup>b</sup> Adjusted for age, gender, origin, education, perceived financial situation, SES of the neighborhood, household composition, smoking status

CI, confidence interval; n, number of participants; NOE, natural outdoor environments

**Table S3.** Mixed effects regression of childhood NOE exposure (low levels vs. high levels) on mental health and vitality (0-100 scales; higher is better mental health/vitality) with additional adjustment for residential surrounding greenness in 100m and 500m (separately). Pooled and city-specific analyses.

|                      | n <sup>a</sup> | Additional adjustment for residential surrounding greenness in 100m<br>$\beta$ -coefficient (95% confidence interval) | Additional adjustment for residential surrounding greenness in 500m<br>$\beta$ -coefficient (95% confidence interval) |
|----------------------|----------------|-----------------------------------------------------------------------------------------------------------------------|-----------------------------------------------------------------------------------------------------------------------|
| <b>Mental health</b> |                |                                                                                                                       |                                                                                                                       |
| Pooled               | 3583           | -4.12 (-5.51, -2.73)***                                                                                               | -4.11 (-5.50, -2.73)***                                                                                               |
| Barcelona            | 983            | -3.90 (-6.30, -1.49)**                                                                                                | -3.90 (-6.31, -1.49)**                                                                                                |
| Doetinchem           | 848            | -0.82 (-4.29, 2.65)                                                                                                   | -0.79 (-4.26, 2.68)                                                                                                   |
| Kaunas               | 892            | -3.69 (-7.12, -0.26)*                                                                                                 | -3.61 (-7.03, -0.18)*                                                                                                 |
| Stoke-on-Trent       | 860            | -5.48 (-7.88, -3.07)***                                                                                               | -5.48 (-7.88, -3.07)***                                                                                               |
| <b>Vitality</b>      |                |                                                                                                                       |                                                                                                                       |
| Pooled               | 3583           | -1.27 (-2.88, 0.34)                                                                                                   | -1.27 (-2.88, 0.34)                                                                                                   |
| Barcelona            | 981            | -1.96 (-4.73, 0.81)                                                                                                   | -1.96 (-4.73, 0.82)                                                                                                   |
| Doetinchem           | 850            | -0.40 (-4.79, 3.99)                                                                                                   | -0.38 (-4.77, 4.01)                                                                                                   |
| Kaunas               | 892            | -3.74 (-7.16, -0.32)*                                                                                                 | -3.78 (-7.19, -0.37)*                                                                                                 |

|                |     |                    |                    |
|----------------|-----|--------------------|--------------------|
| Stoke-on-Trent | 860 | 0.17 (-2.84, 3.18) | 0.22 (-2.79, 3.23) |
|----------------|-----|--------------------|--------------------|

\*  $p \leq 0.05$ ; \*\*  $p < 0.01$ ; \*\*\*  $p < 0.001$ <sup>a</sup> n was the same for the residential surrounding greenness in a radius of 100m and 500m

CI, confidence interval; n, number of participants

**Table S4.** Mixed effects regression of childhood NOE exposure (low levels vs. high levels) on mental health and vitality (0-100 scales; higher is better mental health/vitality) with additional adjustments for the perception of amount of NOE, use of NOE, and satisfaction with NOE. Pooled and city-specific analyses. With a different cut off for childhood NOE exposure (sensitivity analysis). <sup>a</sup>

|                      | Additional adjustment for<br>perception of amount of<br>NOE<br>$\beta$ -coefficient (95% CI), n | Additional adjustment for<br>use of NOE<br>$\beta$ -coefficient (95% CI), n | Additional adjustment for<br>satisfaction with NOE<br>$\beta$ -coefficient (95% CI), n |
|----------------------|-------------------------------------------------------------------------------------------------|-----------------------------------------------------------------------------|----------------------------------------------------------------------------------------|
| <b>Mental Health</b> |                                                                                                 |                                                                             |                                                                                        |
| Pooled               | -3.43 (-4.47, -2.38)***,<br>3578                                                                | -3.58 (-4.63, -2.53)***,<br>3483                                            | -3.36 (-4.40, -2.32)***,<br>3574                                                       |
| Barcelona            | -1.72 (-3.73, 0.29),<br>982                                                                     | -1.75 (-3.77, 0.27),<br>970                                                 | -1.53 (-3.51, 0.45),<br>977                                                            |
| Doetinchem           | -2.63 (-4.72, -0.53)*,<br>848                                                                   | -2.60 (-4.69, -0.50)*,<br>840                                               | -2.31 (-4.39, -0.23)*,<br>848                                                          |
| Kaunas               | -2.44 (-4.65, -0.23)*,<br>892                                                                   | -2.97 (-5.26, -0.68)*,<br>817                                               | -2.36 (-4.57, -0.14)*,<br>892                                                          |
| Stoke-on-Trent       | -6.12 (-8.21, -4.03)***, 856                                                                    | -6.20 (-8.25, -4.14)***, 856                                                | -6.28 (-8.35, -4.21)***, 857                                                           |
| <b>Vitality</b>      |                                                                                                 |                                                                             |                                                                                        |
| Pooled               | -0.90 (-2.11, 0.31), 3578                                                                       | -1.72 (-4.37, 0.94), 3483                                                   | -0.80 (-2.01, 0.41), 3574                                                              |
| Barcelona            | 0.49 (-1.82, 2.80), 980                                                                         | 0.37 (-1.95, 2.70), 968                                                     | 0.59 (-1.70, 2.89), 975                                                                |
| Doetinchem           | -1.79 (-4.44, 0.85), 850                                                                        | -0.52 (-4.90, 3.86), 842                                                    | -1.50 (-4.14, 1.14), 850                                                               |

|                |                            |                            |                            |
|----------------|----------------------------|----------------------------|----------------------------|
| Kaunas         | -2.84 (-5.05, -0.64)*, 892 | -2.97 (-5.27, -0.66)*, 817 | -2.76 (-4.97, -0.55)*, 892 |
| Stoke-on-Trent | 0.33 (-2.29, 2.95), 856    | 0.57 (-2.01-3.15), 856     | 0.17 (-2.41, 2.76), 857    |

\*  $p \leq 0.05$ ; \*\*  $p < 0.01$ ; \*\*\*  $p < 0.001$

<sup>a</sup> Note: Cut offs used for childhood NOE exposure were: “never”, “sometimes”, “regularly” as low levels of childhood NOE exposure (n=1369; 38.19%) and “often”, “very often” as high levels of childhood NOE exposure ( n=2216; 61.81%; reference group).

CI, confidence interval; n, number of participants; NOE, natural outdoor environments.

**Table S5.** Mixed effects regression of childhood NOE exposure on mental health and vitality (0-100 scales; higher is better mental health/vitality) with additional adjustments for importance of NOE, residential surrounding greenness in 300m, and all mediators combined. Pooled and city-specific analyses. With a different cut off for childhood NOE exposure (sensitivity analysis). <sup>a</sup>

|                      | Additional adjustment for<br>importance of NOE<br>$\beta$ -coefficient (95% CI), n | Additional adjustment for<br>residential surrounding<br>greenness in 300m<br>$\beta$ -coefficient (95% CI), n | Additional adjustment for<br>all mediators combined <sup>a</sup><br>$\beta$ -coefficient (95% CI), n |
|----------------------|------------------------------------------------------------------------------------|---------------------------------------------------------------------------------------------------------------|------------------------------------------------------------------------------------------------------|
| <b>Mental health</b> |                                                                                    |                                                                                                               |                                                                                                      |
| Pooled               | -3.34 (-4.38, -2.29)***,<br>3578                                                   | -3.39 (-4.44, -2.35)***,<br>3583                                                                              | -3.54 (-4.60, -2.49)***,<br>3464                                                                     |
| Barcelona            | -1.84 (-3.85, 0.18),<br>981                                                        | -1.88 (-3.88, 0.11),<br>983                                                                                   | -1.47 (-3.50, 0.56),<br>961                                                                          |
| Doetinchem           | -2.61 (-4.71, -0.51)*,<br>847                                                      | -2.69 (-4.79, -0.60)*,<br>848                                                                                 | -2.29 (-4.38, -0.20)*,<br>839                                                                        |
| Kaunas               | -2.30 (-4.52, -0.08)*,<br>892                                                      | -2.32 (-4.54, -0.10)*,<br>892                                                                                 | -3.05 (-5.33, -0.76)**,<br>817                                                                       |
| Stoke-on-Trent       | -6.10 (-8.15, -4.04)***, 858                                                       | -6.13 (-8.19, -4.06)***, 860                                                                                  | -6.33 (-8.41, -4.24)***, 847                                                                         |
| <b>Vitality</b>      |                                                                                    |                                                                                                               |                                                                                                      |

|                |                            |                            |                            |
|----------------|----------------------------|----------------------------|----------------------------|
| Pooled         | -0.70 (-1.91, 0.51), 3578  | -0.84 (-2.05, 0.37), 3483  | -0.84 (-2.07, 0.38), 3464  |
| Barcelona      | 0.57 (-1.75, 2.88), 979    | 0.35 (-1.95, 2.64), 981    | 0.82 (-1.53, 3.17), 959    |
| Doetinchem     | -1.75 (-4.41, 0.91), 849   | -1.86 (-4.52, 0.79), 850   | -1.39 (-4.05, 1.27), 841   |
| Kaunas         | -2.70 (-4.91, -0.49)*, 892 | -2.71 (-4.93, -0.50)*, 892 | -3.00 (-5.30, -0.70)*, 817 |
| Stoke-on-Trent | 0.72 (-1.85, 3.29), 858    | 0.68 (-1.92, 3.29), 860    | 0.07 (-2.51, 2.65), 847    |

---

\*  $p \leq 0.05$ ; \*\*  $p < 0.01$ ; \*\*\*  $p < 0.001$

<sup>a</sup> “All mediators” includes: perception of amount of NOE, use of NOE, satisfaction with NOE, importance of NOE, NDIV in 300m

<sup>a</sup> Note: Cut offs used for childhood NOE exposure were: “never”, “sometimes”, “regularly” as low levels of childhood NOE exposure (n=1369; 38.19%) and “often”, “very often” as high levels of childhood NOE exposure ( n=2216; 61.81%; reference group).

CI, confidence interval; n, number of participants; NOE, natural outdoor environments.

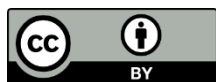

© 2019 by the authors. Submitted for possible open access publication under the terms and conditions of the Creative Commons Attribution (CC BY) license (<http://creativecommons.org/licenses/by/4.0/>).
